# Supplementary material for: In vivo and in silico evaluation of the phytoalexin-eliciting activity in common bean (Phaseolus vulgaris L.) of jasmonoyl-l-isoleucine analogs having a pyrazolidin-3-one ring
Source: Royal Society of Chemistry journal article supplement (doi:10.1039/d4ra06461e), 2024-01-01

## Supporting Information

### ***in vivo* and *in silico* evaluation of jasmonoyl-L-isoleucine analogs having a pyrazolidin-3-one ring**

**Samuel Vizcaíno Páez<sup>a,b</sup>, Diego Durango<sup>b</sup>, Wiston Quiñones<sup>a\*</sup>**

<sup>a</sup>Química Orgánica de Productos Naturales, Universidad de Antioquia, Medellín, 050010, Antioquia, Colombia. E-mail: wiston.quinones@udea.edu.co.

<sup>b</sup>Química de los Productos Naturales y los Alimentos, Universidad Nacional de Colombia, Medellín, 050034, Antioquia, Colombia.

# Table of Contents

|    |                                                              |     |
|----|--------------------------------------------------------------|-----|
| 1  | Chromatograms                                                | S3  |
| 2  | Quantitative data from phytoalexin elicitor activity         | S4  |
| 3  | Tukey HSD analysis of phytoalexins quantifications           | S5  |
| 4  | Calibration curves                                           | S7  |
| 5  | UV-Vis spectra                                               | S8  |
| 6  | Example chromatograms                                        | S9  |
| 7  | Consensus logo of COI1 proteins                              | S10 |
| 8  | Consensus logo of JAZ proteins                               | S11 |
| 9  | Ramachandran plots of SM models                              | S12 |
| 10 | Z-plots of protein models                                    | S13 |
| 11 | Tukey HSD analysis of docking results                        | S14 |
| 12 | Linear correlation of the binding energies between receptors | S15 |

# 1 Chromatograms

Figure S1: Chromatograms of the standards of phytoalexins Daidzein, Genistein, Phaseollin and Coumestrol.

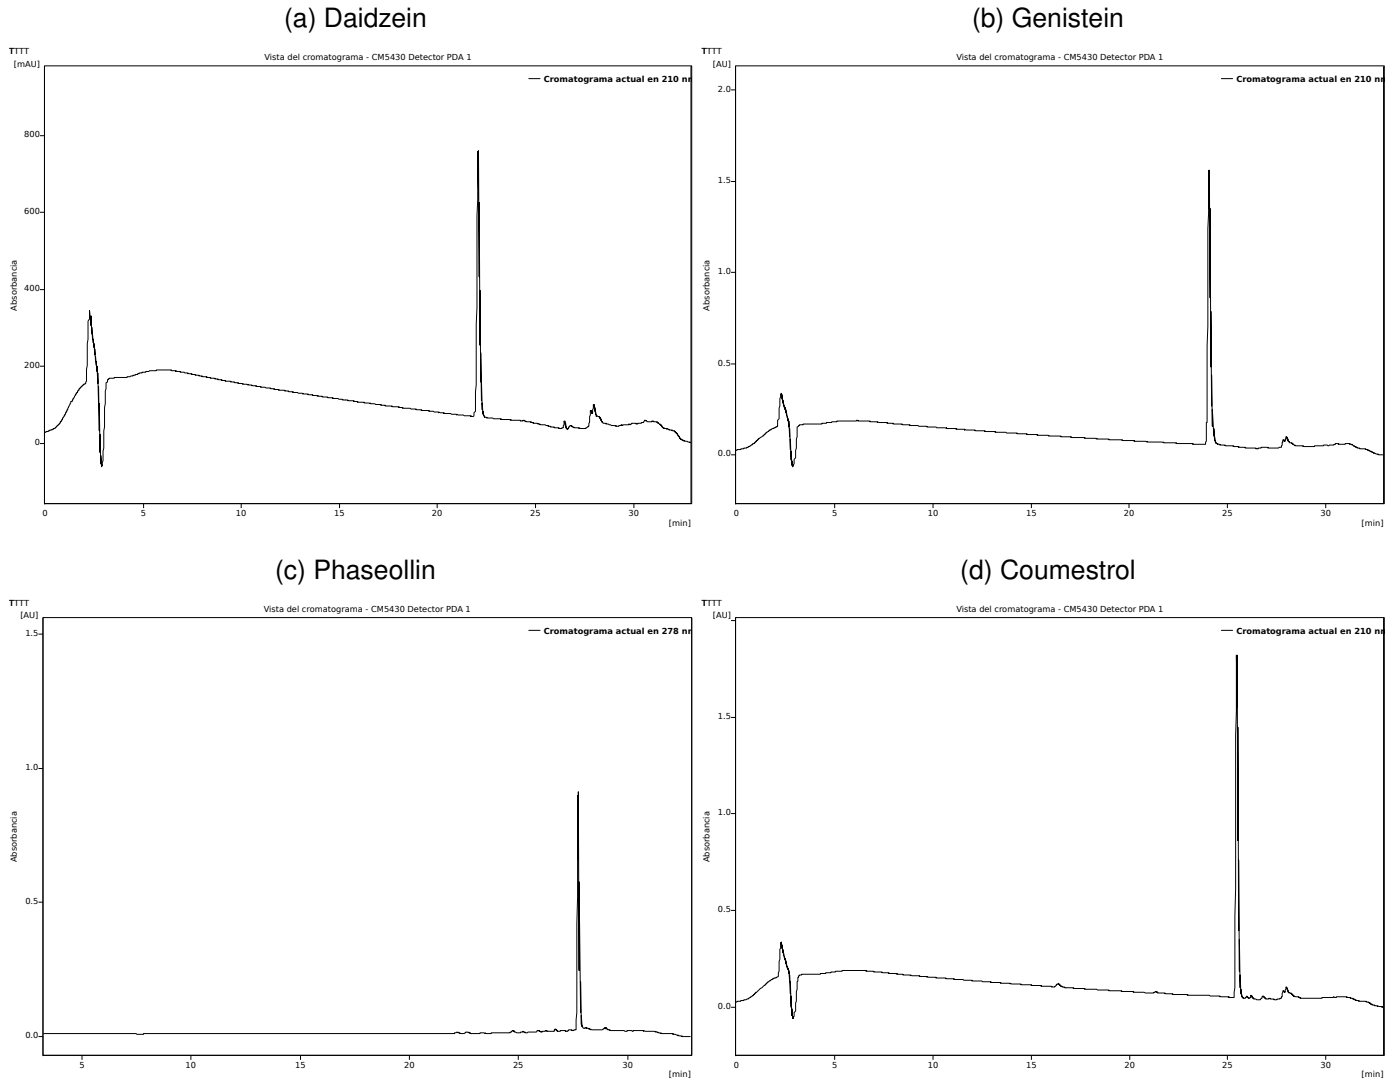

## 2 Quantitative data from phytoalexin elicitor activity

Table S1: Phytoalexins quantifications for treatments at 0.05 mM

| Treatment | Sample | g f. w. | EtOH ext. [g] | Yield (%) | Daidzein [µg/mL] | Coumestrol [µg/mL] | Genistein [µg/mL] | Phaseollin [µg/mL] | Daidzein | Coumestrol | Genistein | Phaseollin |
|-----------|--------|---------|---------------|-----------|------------------|--------------------|-------------------|--------------------|----------|------------|-----------|------------|
| 6@0.5 mM  | 1      | 4.7928  | 0.2288        | 4.8       | 0.508            | 2.124              | 0.167             | 24.922             | 0.530    | 2.216      | 0.174     | 25.999     |
| 6@0.5 mM  | 2      | 4.5379  | 0.2267        | 5.0       | 0.236            | 1.599              | 0.305             | 19.241             | 0.260    | 1.762      | 0.336     | 21.200     |
| 7a        | 1      | 5.1080  | 0.1987        | 3.9       | 1.309            | 4.221              | 0.275             | 17.905             | 1.281    | 4.132      | 0.269     | 17.526     |
| 7a        | 2      | 5.6658  | 0.2092        | 3.7       | 1.002            | 3.694              | 0.225             | 19.089             | 0.884    | 3.260      | 0.199     | 16.846     |
| 7b        | 1      | 4.5965  | 0.0806        | 1.8       | 2.558            | 5.192              | 0.481             | 16.935             | 2.783    | 5.648      | 0.523     | 18.422     |
| 7b        | 2      | 4.6229  | 0.1688        | 3.7       | 0.382            | 4.191              | 0.243             | 17.532             | 0.413    | 4.533      | 0.263     | 18.962     |
| 7c        | 1      | 7.0260  | 0.2014        | 2.9       | 0.813            | 4.418              | 0.181             | 19.605             | 0.579    | 3.144      | 0.129     | 13.952     |
| 7c        | 2      | 6.2709  | 0.2027        | 3.2       | 0.810            | 4.014              | 0.147             | 20.759             | 0.646    | 3.200      | 0.117     | 16.552     |
| 7d        | 1      | 5.8097  | 0.2015        | 3.5       | 0.380            | 2.716              | 0.111             | 17.301             | 0.327    | 2.337      | 0.096     | 14.890     |
| 7d        | 2      | 4.3860  | 0.1712        | 3.9       | 0.477            | 2.089              | 0.099             | 18.699             | 0.544    | 2.381      | 0.113     | 21.317     |
| 7e        | 1      | 5.0047  | 0.2373        | 4.7       | 2.977            | 4.325              | 0.296             | 38.112             | 2.974    | 4.321      | 0.296     | 38.076     |
| 7e        | 2      | 4.0713  | 0.1514        | 3.7       | 1.234            | 3.218              | 0.184             | 23.765             | 1.515    | 3.952      | 0.226     | 29.186     |
| 7f        | 1      | 3.2649  | 0.1509        | 4.6       | 0.511            | 2.193              | 0.250             | 12.983             | 0.783    | 3.358      | 0.383     | 19.883     |
| 7f        | 2      | 4.5961  | 0.1883        | 4.1       | 0.808            | 5.108              | 0.169             | 16.807             | 0.879    | 5.557      | 0.184     | 18.284     |
| 7g        | 1      | 7.3280  | 0.1877        | 2.6       | 1.315            | 2.322              | 0.195             | 5.970              | 0.897    | 1.584      | 0.133     | 4.073      |
| 7g        | 2      | 4.9641  | 0.1392        | 2.8       | 0.356            | 1.718              | 0.070             | 3.427              | 0.359    | 1.730      | 0.071     | 3.452      |
| 7h        | 1      | 6.5057  | 0.1631        | 2.5       | 1.337            | 3.728              | 0.269             | 10.801             | 1.028    | 2.865      | 0.207     | 8.301      |
| 7h        | 2      | 5.1764  | 0.1455        | 2.8       | 0.800            | 2.048              | 0.286             | 9.504              | 0.773    | 1.978      | 0.276     | 9.180      |
| 7i        | 1      | 4.3087  | 0.1229        | 2.9       | 0.968            | 1.284              | 0.533             | 9.980              | 1.123    | 1.490      | 0.619     | 11.581     |
| 7i        | 2      | 5.7297  | 0.2081        | 3.6       | 0.633            | 1.408              | 0.274             | 9.694              | 0.552    | 1.229      | 0.239     | 8.459      |
| (-)Blank  | 1      | 6.0340  | 0.1685        | 2.8       | 0.632            | 3.073              | 0.194             | 9.630              | 0.524    | 2.546      | 0.161     | 7.980      |
| (-)Blank  | 2      | 4.7474  | 0.1701        | 3.6       | 0.529            | 2.156              | 0.174             | 5.075              | 0.557    | 2.271      | 0.183     | 5.345      |

Table S2: Phytoalexins quantifications for treatments at 0.05 mM

| Treatment | Sample | g f. w. | EtOH ext. [g] | Yield (%) | Daidzein [µg/mL] | Coumestrol [µg/mL] | Genistein [µg/mL] | Phaseollin [µg/mL] | Daidzein | Coumestrol | Genistein | Phaseollin |
|-----------|--------|---------|---------------|-----------|------------------|--------------------|-------------------|--------------------|----------|------------|-----------|------------|
| 6@0.5 mM  | 1      | 4.7928  | 0.2288        | 4.8       | 0.508            | 2.124              | 0.167             | 24.922             | 0.530    | 2.216      | 0.174     | 25.999     |
| 6@0.5 mM  | 2      | 4.5379  | 0.2267        | 5.0       | 0.236            | 1.599              | 0.305             | 19.241             | 0.260    | 1.762      | 0.336     | 21.200     |
| 7a        | 1      | 5.0657  | 0.1896        | 3.7       | 3.871            | 6.221              | 0.447             | 49.622             | 3.821    | 6.140      | 0.441     | 48.978     |
| 7a        | 2      | 4.3521  | 0.1536        | 3.5       | 1.552            | 6.350              | 0.169             | 38.918             | 1.783    | 7.295      | 0.194     | 44.712     |
| 7b        | 1      | 2.9062  | 0.1349        | 4.6       | 0.853            | 5.531              | 0.294             | 40.777             | 1.468    | 9.516      | 0.506     | 70.155     |
| 7b        | 2      | 4.0362  | 0.1826        | 4.5       | 0.916            | 6.480              | 0.250             | 44.921             | 1.135    | 8.027      | 0.310     | 55.648     |
| 7c        | 1      | 5.3999  | 0.1812        | 3.4       | 0.984            | 5.682              | 0.126             | 40.451             | 0.911    | 5.261      | 0.117     | 37.455     |
| 7c        | 2      | 2.6408  | 0.0977        | 3.7       | 1.813            | 2.506              | 0.198             | 19.944             | 3.433    | 4.745      | 0.375     | 37.761     |
| 7d        | 1      | 3.9616  | 0.1256        | 3.2       | 0.526            | 3.225              | 0.180             | 29.026             | 0.664    | 4.070      | 0.227     | 36.634     |
| 7d        | 2      | 5.7544  | 0.2076        | 3.6       | 0.759            | 5.102              | 0.169             | 44.173             | 0.659    | 4.433      | 0.147     | 38.382     |
| 7e        | 1      | 5.1854  | 0.1814        | 3.5       | 0.734            | 4.268              | 0.195             | 40.578             | 0.708    | 4.115      | 0.188     | 39.127     |
| 7e        | 2      | 5.6788  | 0.1783        | 3.1       | 0.462            | 5.801              | 0.121             | 60.065             | 0.407    | 5.108      | 0.107     | 52.885     |
| 7f        | 1      | 2.7148  | 0.1062        | 3.9       | 0.723            | 4.634              | 0.175             | 23.102             | 1.332    | 8.535      | 0.322     | 42.548     |
| 7f        | 2      | 3.3656  | 0.1781        | 5.3       | 0.948            | 5.094              | 0.222             | 26.641             | 1.408    | 7.568      | 0.330     | 39.578     |
| 7g        | 1      | 4.4878  | 0.1871        | 4.2       | 1.988            | 6.183              | 0.385             | 20.801             | 2.215    | 6.889      | 0.429     | 23.175     |
| 7g        | 2      | 3.7168  | 0.1717        | 4.6       | 0.337            | 4.225              | 0.192             | 14.791             | 0.453    | 5.684      | 0.258     | 19.897     |
| 7h        | 1      | 8.1951  | 0.2160        | 2.6       | 0.555            | 4.110              | 0.164             | 11.881             | 0.339    | 2.508      | 0.100     | 7.249      |
| 7h        | 2      | 7.4306  | 0.1710        | 2.3       | 0.550            | 3.756              | 0.107             | 11.101             | 0.370    | 2.527      | 0.072     | 7.470      |
| 7i        | 1      | 6.7301  | 0.2252        | 3.3       | 0.652            | 1.162              | 0.136             | 11.652             | 0.484    | 0.863      | 0.101     | 8.657      |
| 7i        | 2      | 9.2051  | 0.3307        | 3.6       | 2.794            | 2.081              | 0.335             | 10.789             | 1.518    | 1.130      | 0.182     | 5.860      |
| (-)Blank  | 1      | 6.0340  | 0.1685        | 2.8       | 0.632            | 3.073              | 0.194             | 9.630              | 0.524    | 2.546      | 0.161     | 7.980      |
| (-)Blank  | 2      | 4.7474  | 0.1701        | 3.6       | 0.529            | 2.156              | 0.174             | 5.075              | 0.557    | 2.271      | 0.183     | 5.345      |





## 4 Calibration curves

Figure S2: Calibration curves of the standards.

(a) Daidzein.  $R = 0.99974$

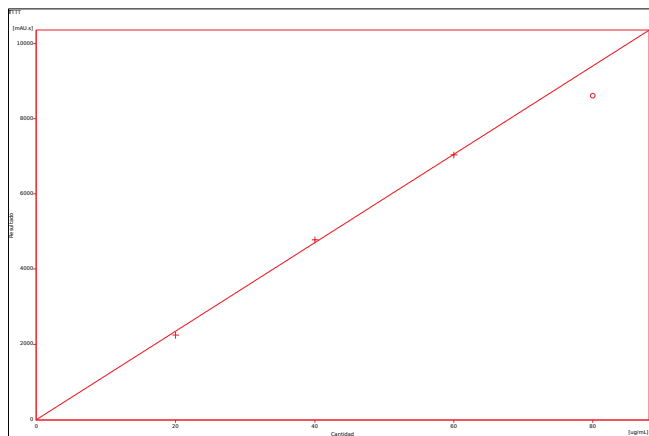

(b) Genistein.  $R = 0.99867$

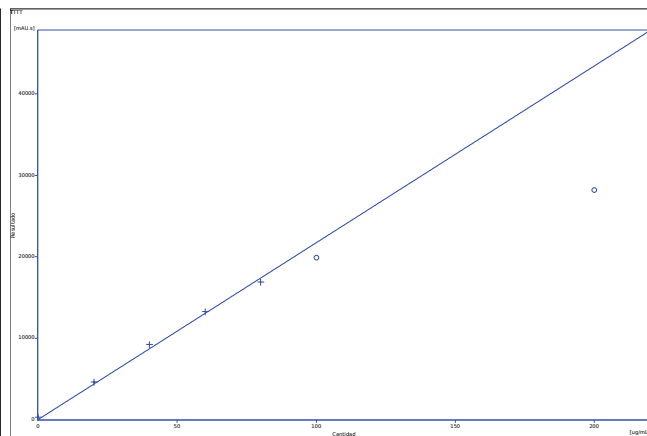

(c) Phaseollin.  $R = 0.99986$

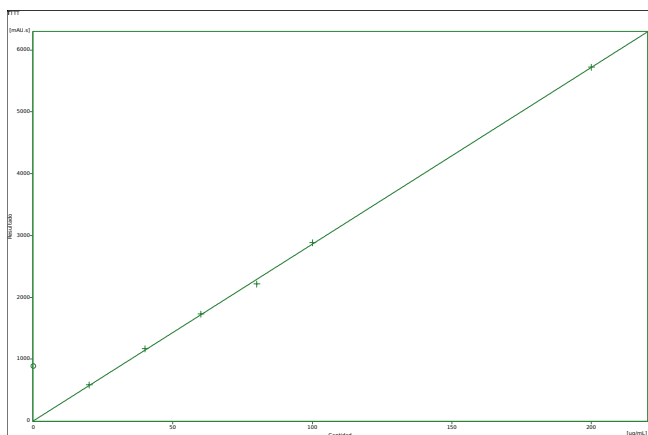

(d) Coumestrol.  $R = 0.99862$

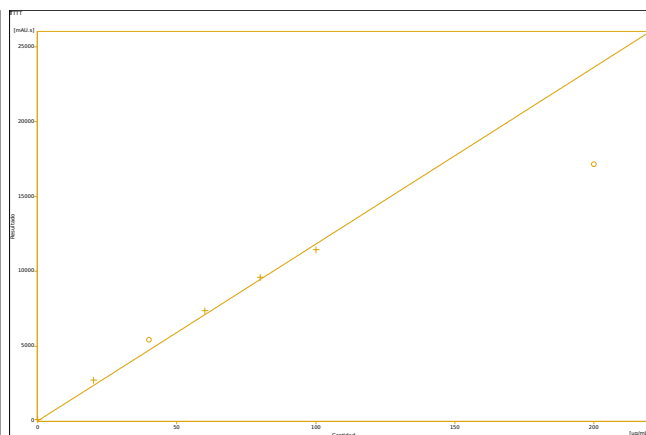

## 5 UV-Vis spectra

Figure S3: UV-Vis spectra of the standards.

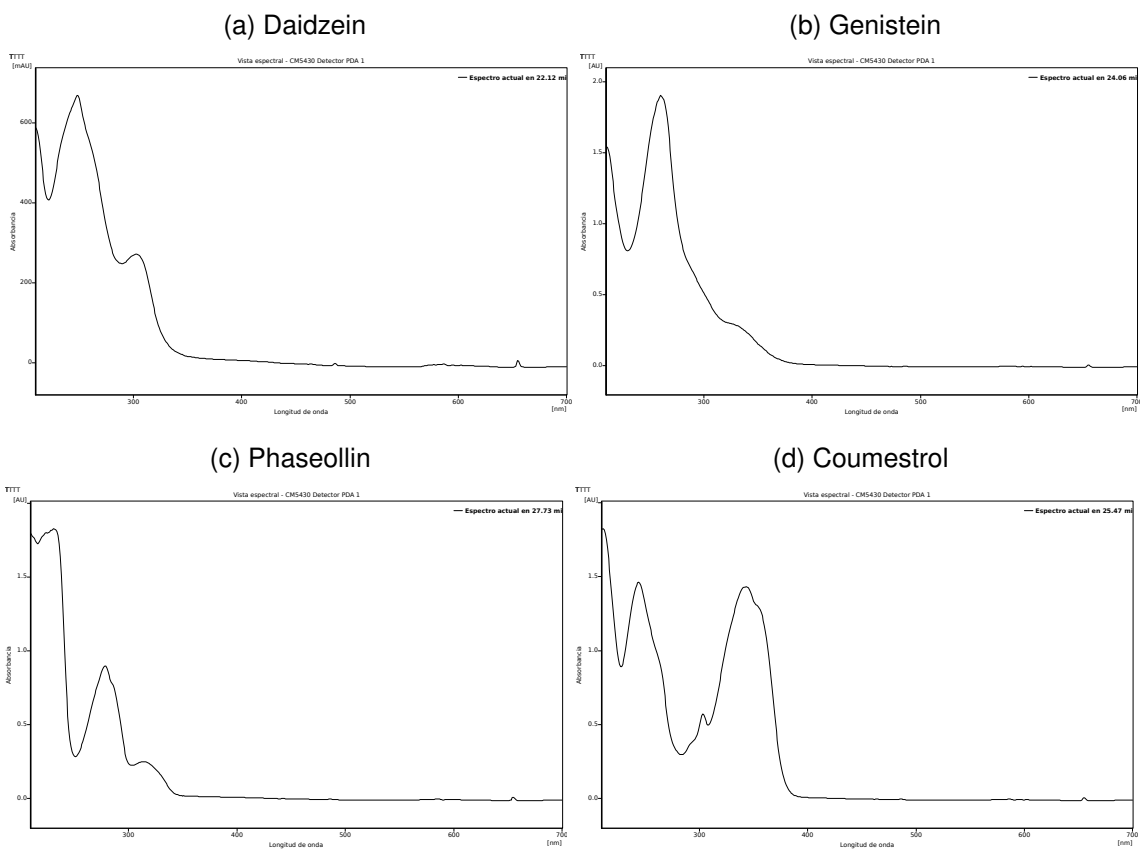



## 6 Example chromatograms

Figure S4: Chromatograms at 278 nm (green) and 343 nm (pink) after the induction with **7i** at 0.5 mM (a), and from a negative blank (b).

(a) **7i** at 0.5 mM

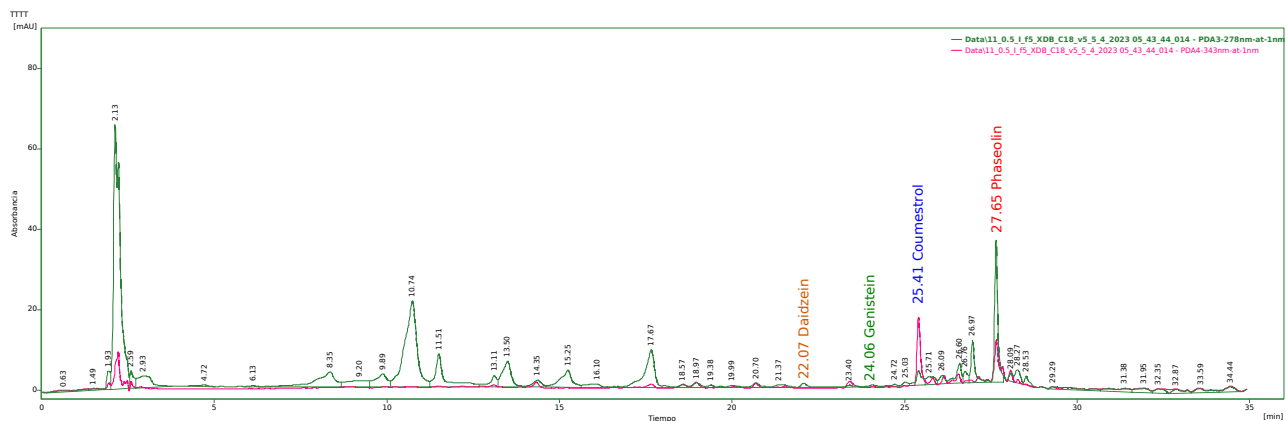

(b) Negative blank

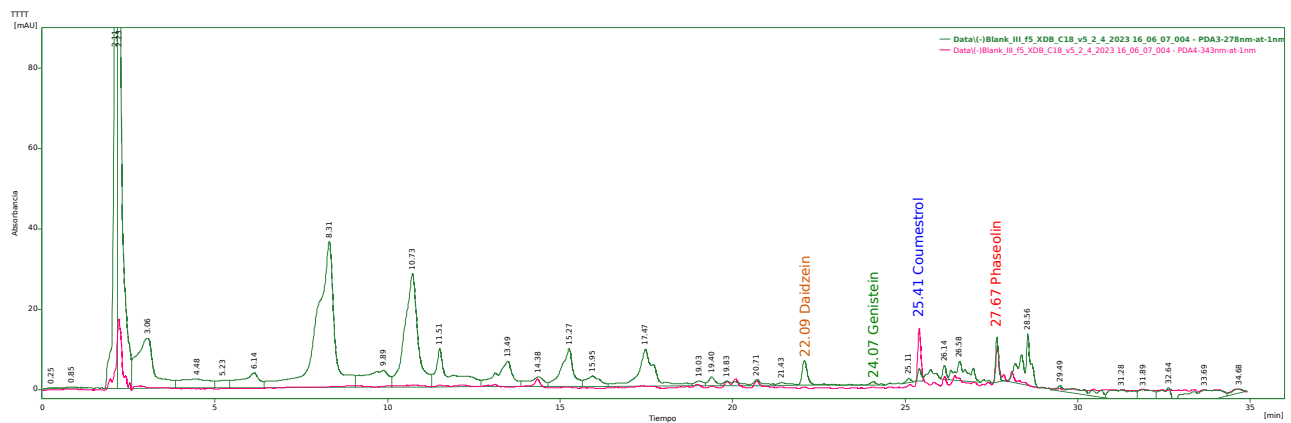

## 7 Consensus logo of COI1 proteins

Figure S5: Logo of sequence conservation in COI1 proteins.

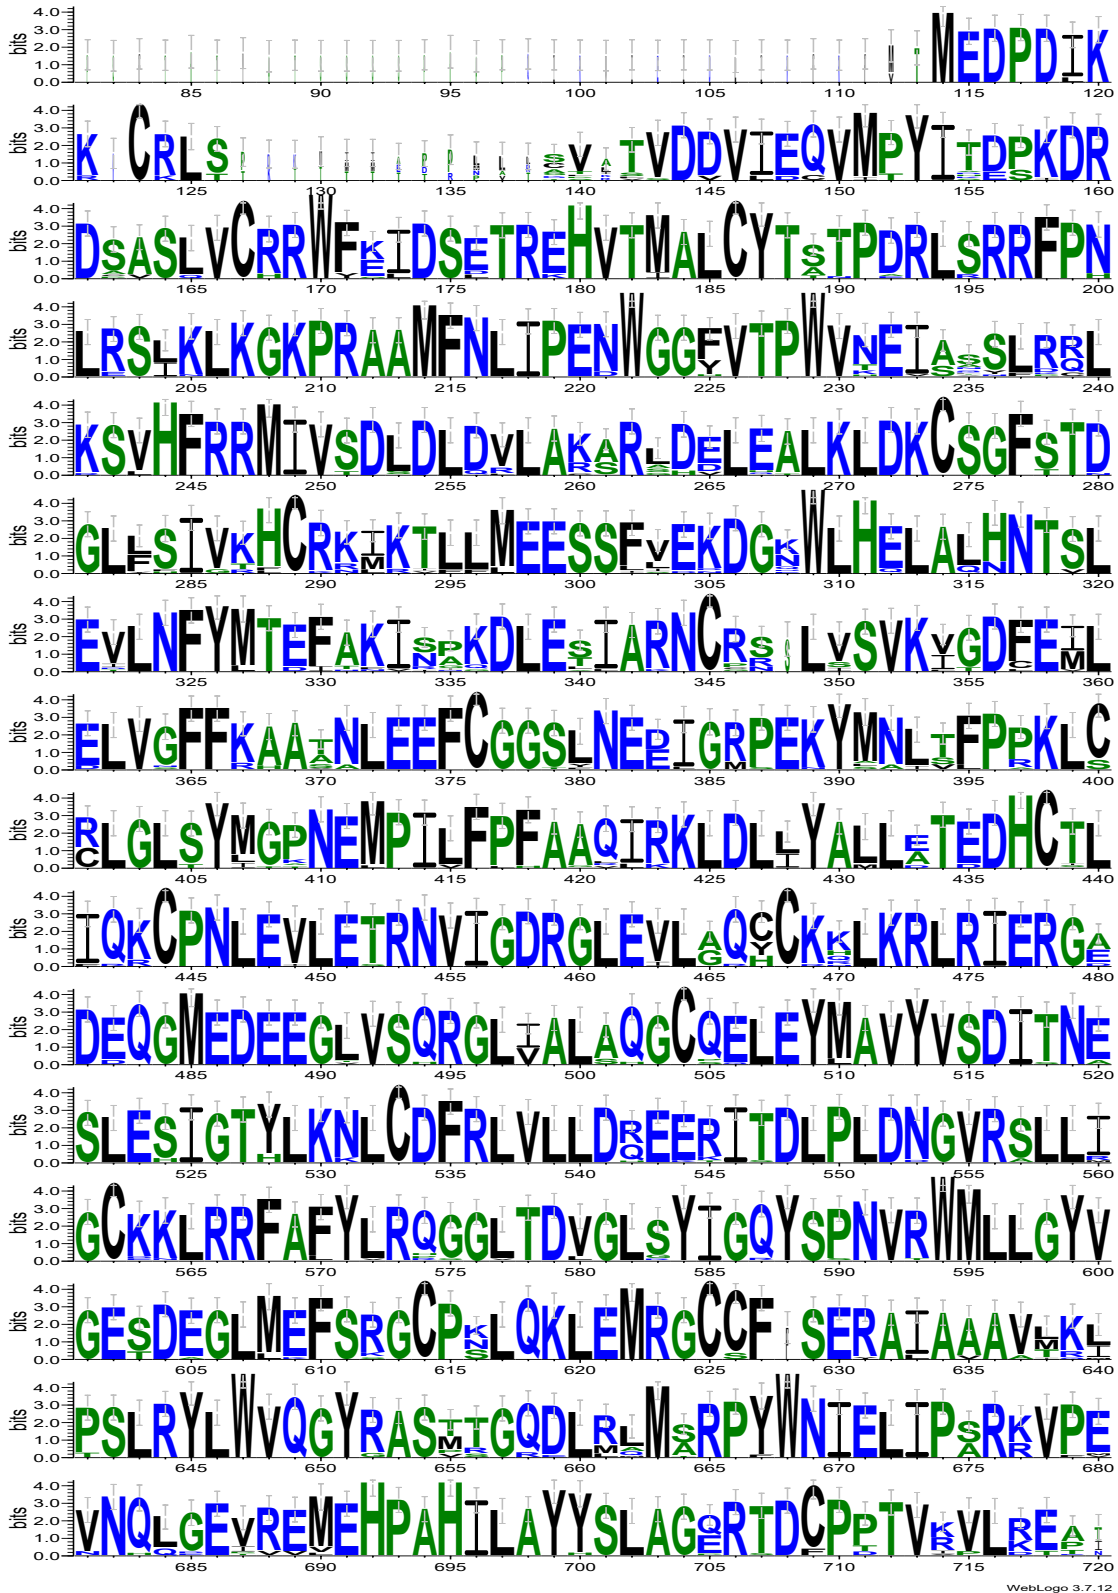

## 8 Consensus logo of JAZ proteins

Figure S6: Logo of sequence conservation in JAZ proteins.

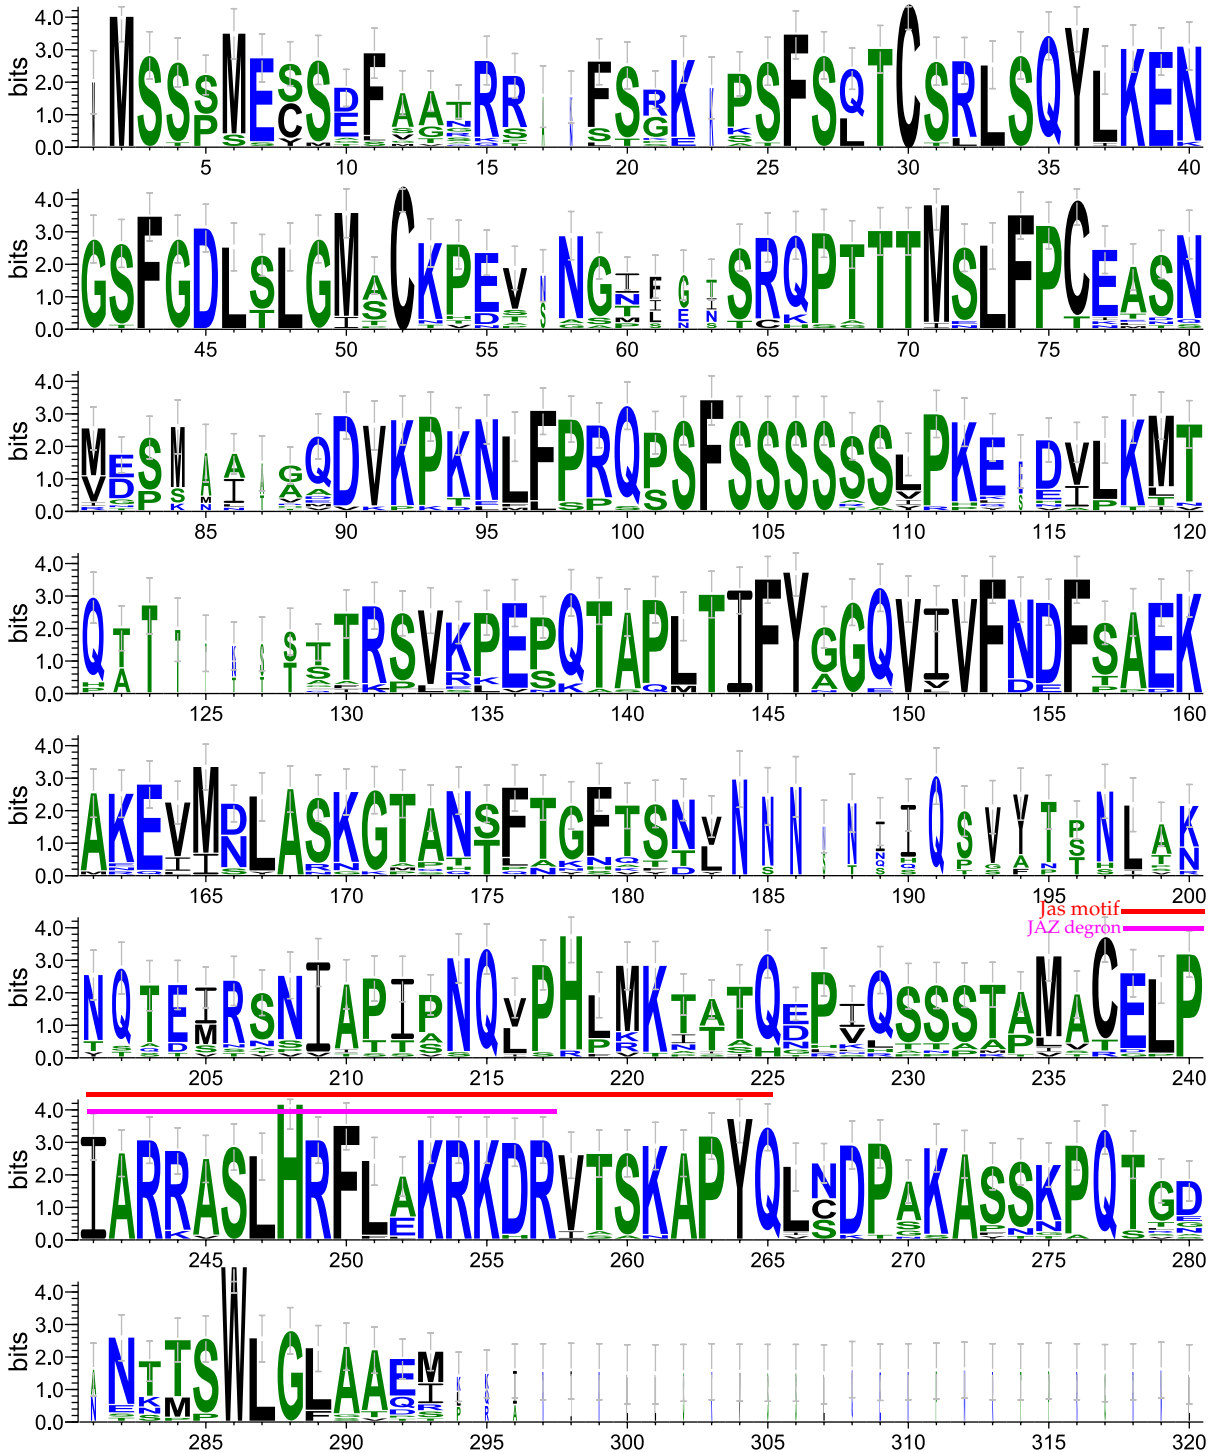

## 9 Ramachandran plots of SM models

Figure S7: Ramachandran plots for V7CZF7 (a), V7BBE9 (b), V7CCD0 (c), V7AYI4 (d).

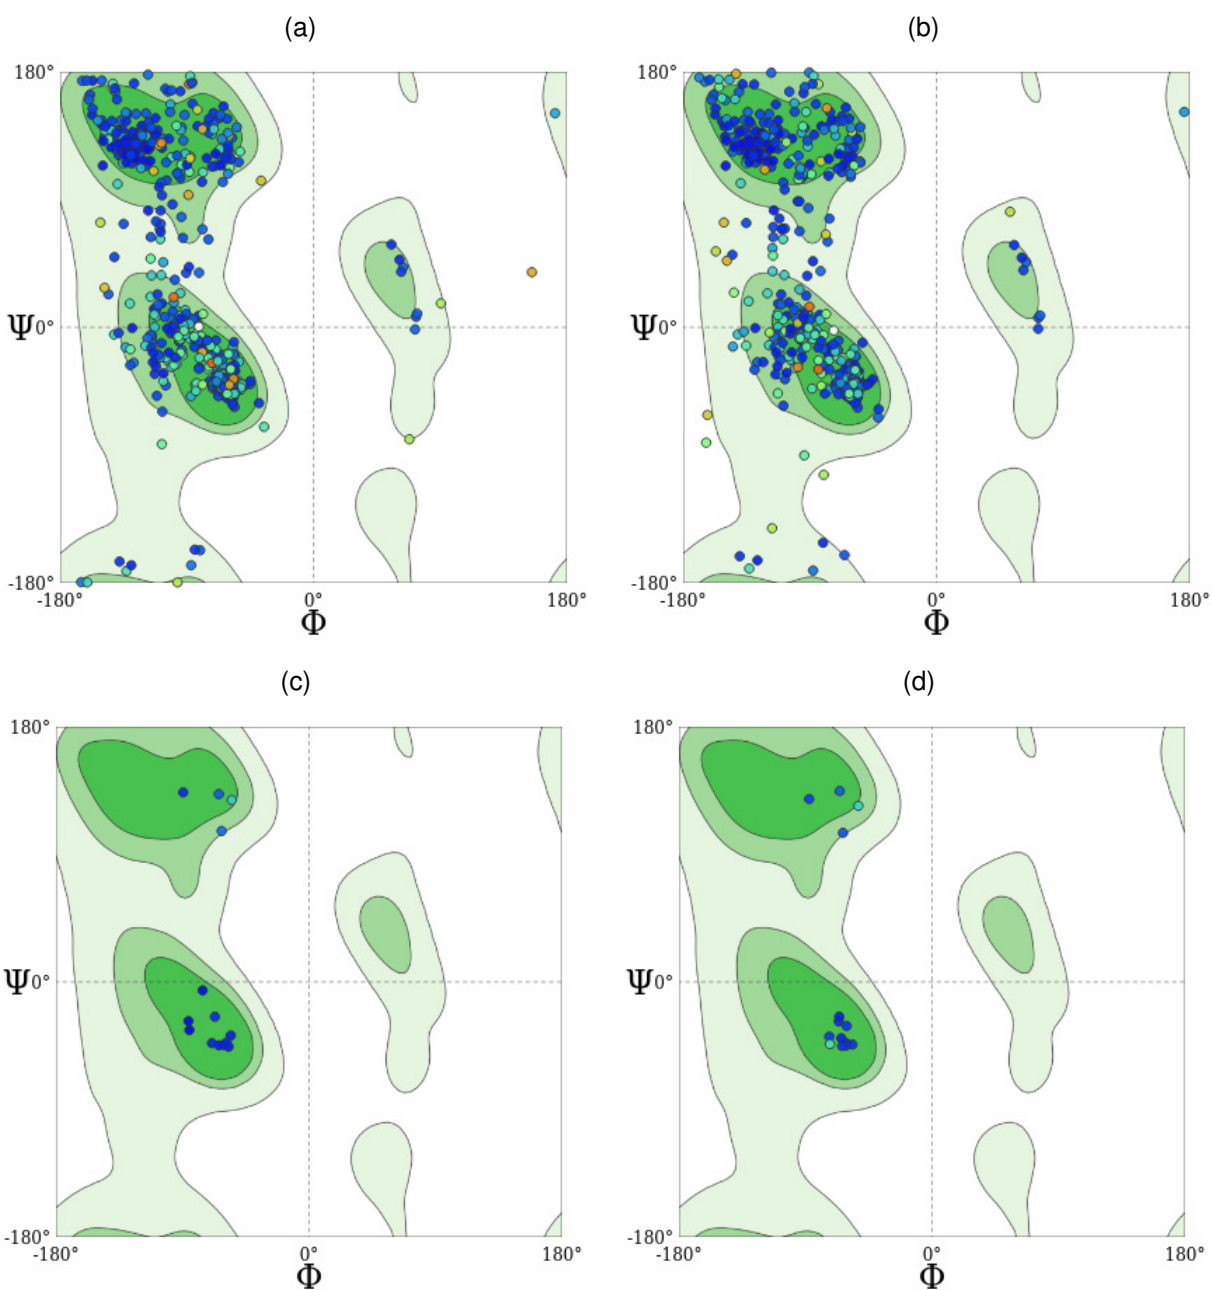

## 10 Z-plots of protein models

Figure S8: Z-scores for COI1 protein models.

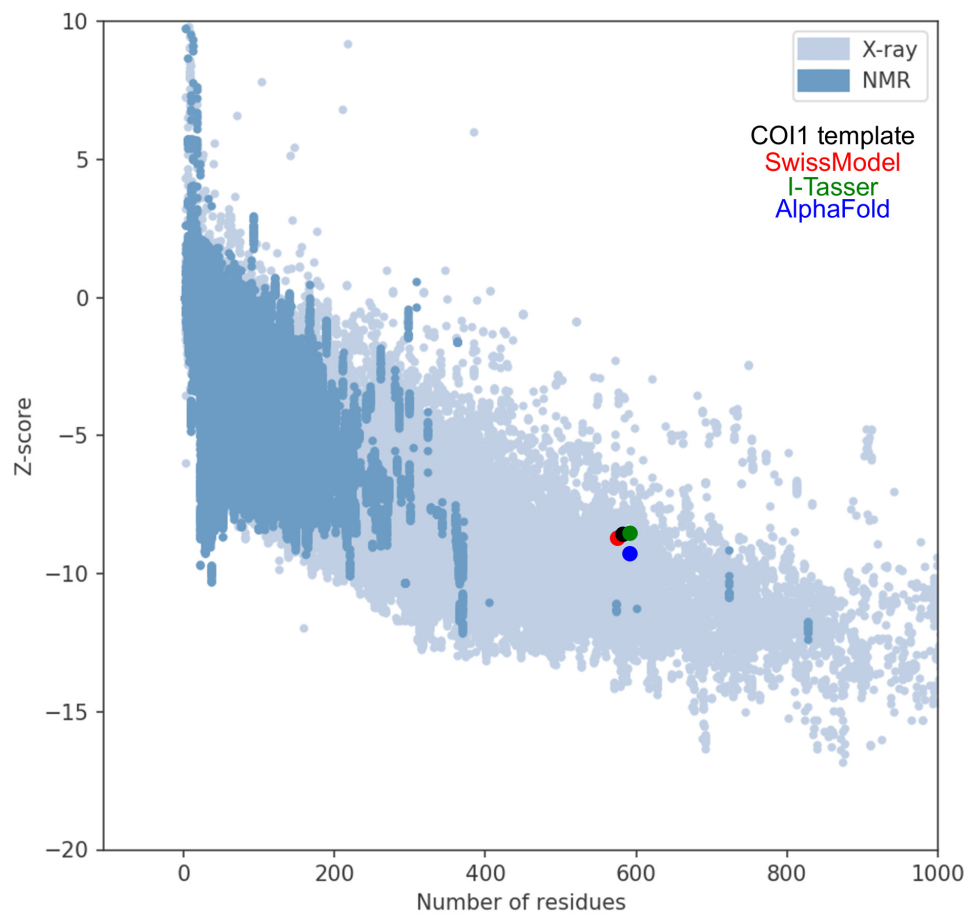

# 11 Tukey HSD analysis of docking results

Table S5: Matrix of significant differences of binding energies from docking. Value of 1 represents significant differences.

|          | 7a-ARATH | 7a-PHAVU | 7b-ARATH | 7b-PHAVU | 7c-ARATH | 7c-PHAVU | 7d-ARATH | 7d-PHAVU | 7e-ARATH | 7e-PHAVU | 7f-ARATH | 7f-PHAVU | 7g-ARATH | 7g-PHAVU | 7h-ARATH | 7h-PHAVU | 7i-ARATH | 7i-PHAVU | 8-ARATH | 8-PHAVU | 9-ARATH | 9-PHAVU |
|----------|----------|----------|----------|----------|----------|----------|----------|----------|----------|----------|----------|----------|----------|----------|----------|----------|----------|----------|---------|---------|---------|---------|
| 7a-ARATH | 0        | 1        | 0        | 0        | 0        | 1        | 0        | 1        | 0        | 0        | 0        | 1        | 0        | 1        | 0        | 1        | 1        | 1        | 1       | 1       | 0       | 0       |
| 7a-PHAVU | 1        | 0        | 0        | 0        | 0        | 0        | 0        | 0        | 0        | 0        | 0        | 1        | 1        | 0        | 0        | 1        | 1        | 1        | 1       | 1       | 1       | 1       |
| 7b-ARATH | 0        | 0        | 0        | 0        | 0        | 1        | 0        | 1        | 0        | 0        | 0        | 1        | 0        | 1        | 0        | 1        | 1        | 1        | 1       | 1       | 0       | 0       |
| 7b-PHAVU | 0        | 0        | 0        | 0        | 0        | 0        | 0        | 0        | 0        | 0        | 0        | 1        | 1        | 0        | 0        | 1        | 1        | 1        | 1       | 1       | 1       | 0       |
| 7c-ARATH | 0        | 0        | 0        | 0        | 0        | 0        | 0        | 0        | 0        | 0        | 0        | 1        | 1        | 0        | 0        | 1        | 1        | 1        | 1       | 1       | 1       | 0       |
| 7c-PHAVU | 1        | 0        | 1        | 0        | 0        | 0        | 0        | 0        | 0        | 0        | 0        | 1        | 1        | 0        | 0        | 1        | 0        | 1        | 1       | 1       | 1       | 1       |
| 7d-ARATH | 0        | 0        | 0        | 0        | 0        | 0        | 0        | 0        | 0        | 0        | 0        | 1        | 1        | 0        | 0        | 1        | 1        | 1        | 1       | 1       | 1       | 0       |
| 7d-PHAVU | 1        | 0        | 1        | 0        | 0        | 0        | 0        | 0        | 1        | 0        | 0        | 1        | 1        | 0        | 0        | 1        | 0        | 1        | 1       | 1       | 1       | 1       |
| 7e-ARATH | 0        | 0        | 0        | 0        | 0        | 0        | 0        | 1        | 0        | 0        | 0        | 1        | 0        | 1        | 0        | 1        | 1        | 1        | 1       | 1       | 0       | 0       |
| 7e-PHAVU | 0        | 0        | 0        | 0        | 0        | 0        | 0        | 0        | 0        | 0        | 0        | 1        | 0        | 1        | 0        | 1        | 1        | 1        | 1       | 1       | 1       | 0       |
| 7f-ARATH | 0        | 0        | 0        | 0        | 0        | 0        | 0        | 0        | 0        | 0        | 0        | 1        | 0        | 0        | 0        | 1        | 1        | 1        | 1       | 1       | 0       | 0       |
| 7f-PHAVU | 1        | 1        | 1        | 1        | 1        | 1        | 1        | 1        | 1        | 1        | 1        | 0        | 1        | 1        | 1        | 0        | 0        | 1        | 1       | 1       | 1       | 1       |
| 7g-ARATH | 0        | 1        | 0        | 1        | 1        | 1        | 1        | 1        | 0        | 0        | 0        | 1        | 0        | 1        | 1        | 1        | 1        | 1        | 1       | 1       | 1       | 0       |
| 7g-PHAVU | 1        | 0        | 1        | 0        | 0        | 0        | 0        | 0        | 1        | 1        | 0        | 1        | 1        | 0        | 0        | 1        | 0        | 1        | 1       | 1       | 1       | 1       |
| 7h-ARATH | 0        | 0        | 0        | 0        | 0        | 0        | 0        | 0        | 0        | 0        | 0        | 1        | 1        | 0        | 0        | 1        | 1        | 1        | 1       | 1       | 1       | 0       |
| 7h-PHAVU | 1        | 1        | 1        | 1        | 1        | 1        | 1        | 1        | 1        | 1        | 1        | 0        | 1        | 1        | 1        | 0        | 0        | 1        | 1       | 1       | 1       | 1       |
| 7i-ARATH | 1        | 1        | 1        | 1        | 1        | 0        | 1        | 0        | 1        | 1        | 1        | 0        | 1        | 0        | 1        | 0        | 0        | 1        | 1       | 1       | 1       | 1       |
| 7i-PHAVU | 1        | 1        | 1        | 1        | 1        | 1        | 1        | 1        | 1        | 1        | 1        | 1        | 1        | 1        | 1        | 1        | 1        | 0        | 1       | 1       | 1       | 1       |
| 8-ARATH  | 1        | 1        | 1        | 1        | 1        | 1        | 1        | 1        | 1        | 1        | 1        | 1        | 1        | 1        | 1        | 1        | 1        | 1        | 0       | 1       | 1       | 1       |
| 8-PHAVU  | 1        | 1        | 1        | 1        | 1        | 1        | 1        | 1        | 1        | 1        | 1        | 1        | 1        | 1        | 1        | 1        | 1        | 1        | 1       | 0       | 1       | 1       |
| 9-ARATH  | 0        | 1        | 0        | 1        | 1        | 1        | 1        | 1        | 0        | 0        | 0        | 1        | 0        | 1        | 1        | 1        | 1        | 1        | 1       | 1       | 0       | 0       |
| 9-PHAVU  | 0        | 1        | 0        | 0        | 0        | 1        | 0        | 1        | 0        | 0        | 0        | 1        | 0        | 1        | 0        | 1        | 1        | 1        | 1       | 1       | 0       | 0       |

## 12 Linear correlation of the binding energies between receptors

Figure S9: Pearson's correlation coefficient from the binding energies of the docked molecules in receptors of *A. thaliana* (ARATH) and *P. vulgaris* (PHAVU).

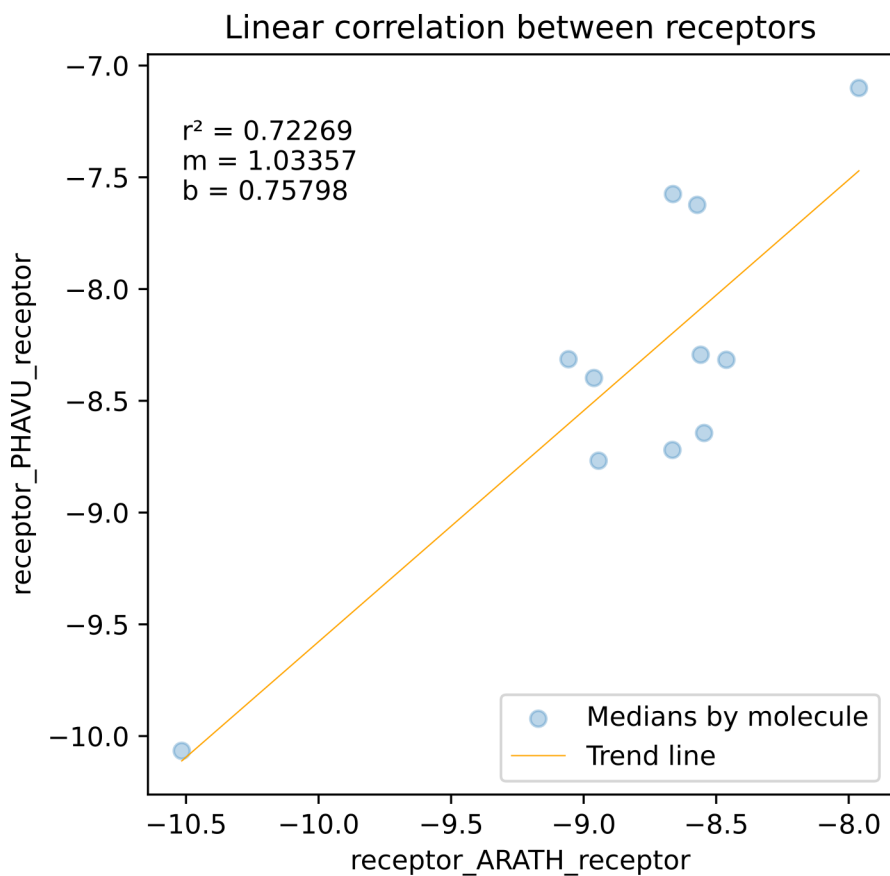

Supplement: d4ra06461e2.pdf [file d4ra06461e2.pdf]
